# Supplementary material
Source: publisher figshare collection journal article supplement (https://gsajournals.figshare.com/ndownloader/files/15090257)
Supplement: Supplementary file 1 [file 15090257]

## Sheet: Sheet1
File S2. Interaction partners of VE-2::sGFP fusion in velBD strain of in A. nidulans
Accession	Description	Score	Coverage	# Proteins	# Unique Peptides	# Peptides	# PSMs	# AAs	MW [kDa]	calc. pI
NCU02775T0	NCU02775 | Neurospora crassa OR74A hypothetical protein (471 aa)	117.602	46.6	1	15	15	37	470	50.9594	7.15186
AN1052	veA AspGDID:ASPL0000052200 COORDS:ChrVIII_A_nidulans_FGSC_A4:1669067-1667399C, translated using codon table 1 (537 amino acids) Verified ORF; Protein involved in light-sensitive control of differentiation and secondary metabolism; localizes to the nucleus in dark and to both nucleus and cytoplasm in the light; induced by light; AspGD sequence represents the veA1 mutant allele	30.5788	18.44	1	9	9	11	537	59.2813	9.27588
AN4859	pmaA AspGDID:ASPL0000077585 COORDS:ChrIII_A_nidulans_FGSC_A4:748768-745667C, translated using codon table 1 (990 amino acids) Uncharacterized ORF; Plasma membrane ATPase with a predicted role in energy metabolism	18.8372	11.92	2	8	8	10	990	108.686	5.36377
AN0807	laeA AspGDID:ASPL0000059499 COORDS:ChrVIII_A_nidulans_FGSC_A4:2423500-2422246C, translated using codon table 1 (374 amino acids) Verified ORF; Methyltransferase-domain protein; velvet complex component composed of VelB, VeA and LaeA; self-methylates; coordinates asexual development in response to light; regulates secondary metabolism and is required for Hulle cell formation	13.585	27.01	1	7	7	7	374	42.9378	6.39209
AN7222	AN7222 AspGDID:ASPL0000066878 COORDS:ChrIV_A_nidulans_FGSC_A4:636437-630092C, translated using codon table 1 (2062 amino acids) Uncharacterized ORF; NACHT domain-containing protein; transcript is induced by nitrate	3.83417	3.15	1	5	5	5	2062	232.551	7.09326
AN7836	AN7836 AspGDID:ASPL0000068328 COORDS:ChrIV_A_nidulans_FGSC_A4:2821557-2822689W, translated using codon table 1 (342 amino acids) Uncharacterized ORF; Ortholog of <i>A. fumigatus Af293</i> : Afu7g01060, <i>A. oryzae RIB40</i> : AO090003000833, <i>Neosartorya fischeri NRRL 181</i> : NFIA_113770 and <i>Aspergillus terreus NIH2624</i> : ATET_02590	7.7256	15.5	1	4	4	4	342	36.483	5.56689
AN7570	tubB AspGDID:ASPL0000065841 COORDS:ChrIV_A_nidulans_FGSC_A4:1979601-1977747C, translated using codon table 1 (451 amino acids) Verified ORF; Alpha-tubulin, forms a heterodimer with beta-tubulin that promotes microtubule assembly; non-essential subunit required for meiosis and formation of ascospores	2.18849	13.53	1	4	4	4	451	50.0276	5.10986
AN1182	benA AspGDID:ASPL0000060381 COORDS:ChrVIII_A_nidulans_FGSC_A4:1268188-1270053W, translated using codon table 1 (447 amino acids) Verified ORF; Beta-tubulin, highly conserved component of microtubules; <I>A. nidulans</I> has two beta-tubulin genes, benA and tubC; temperature sensitive mutants are blocked in mitosis and in nuclear division	8.78549	14.99	1	3	4	4	447	49.8199	4.89404
AN7877	AN7877 AspGDID:ASPL0000015573 COORDS:ChrII_A_nidulans_FGSC_A4:94602-93359C, translated using codon table 1 (383 amino acids) Uncharacterized ORF; RTA-like protein; predicted secondary metabolism gene cluster member	8.43139	6.53	1	2	2	3	383	43.3216	9.59814
AN3481	AN3481 AspGDID:ASPL0000017689 COORDS:ChrII_A_nidulans_FGSC_A4:4038965-4038562C, translated using codon table 1 (106 amino acids) Uncharacterized ORF; Ortholog(s) have carbohydrate binding activity	5.57785	42.45	1	2	2	2	106	11.8106	4.22119
AN7950	eglC AspGDID:ASPL0000016850 COORDS:ChrII_A_nidulans_FGSC_A4:309091-307694C, translated using codon table 1 (465 amino acids) Uncharacterized ORF; Putative glucan endo-1,3-beta-D-glucosidase with predicted role in degradation of glucans; glycosyl phosphatidylinositol (GPI)-linked protein	3.70998	4.73	1	2	2	2	465	46.6566	4.60205
AN7177	AN7177 AspGDID:ASPL0000067256 COORDS:ChrIV_A_nidulans_FGSC_A4:767854-768621W, translated using codon table 1 (231 amino acids) Uncharacterized ORF; Ortholog of <i>A. fumigatus Af293</i> : Afu4g03322, <i>A. niger CBS 513.88</i> : An14g01990, <i>A. oryzae RIB40</i> : AO090011000139, <i>Aspergillus sydowii</i> : Aspsy1_0052594 and <i>Aspergillus terreus NIH2624</i> : ATET_02136	3.19042	14.29	1	2	2	2	231	25.877	4.79248
AN2385	xgeA AspGDID:ASPL0000048995 COORDS:ChrVII_A_nidulans_FGSC_A4:3753825-3751945C, translated using codon table 1 (626 amino acids) Verified ORF; Protein with licheninase activity, involved in degradation of glucans: predicted glycosyl phosphatidylinositol (GPI)-anchor	2.30156	3.51	1	2	2	2	626	65.0572	4.66553
AN5028	ppoC AspGDID:ASPL0000070637 COORDS:ChrIII_A_nidulans_FGSC_A4:241516-237584C, translated using codon table 1 (1117 amino acids) Verified ORF; Fatty acid oxygenase that plays a role in oxylipin biosynthesis; responsible for the formation of the psi-factor component psiB-beta; expression reduced after exposure to farnesol	1.93395	1.61	1	2	2	2	1117	124.73	6.40479
AN10103	hmbC AspGDID:ASPL0000054741 COORDS:ChrVIII_A_nidulans_FGSC_A4:3569158-3570516W, translated using codon table 1 (297 amino acids) Uncharacterized ORF; High-mobility group (HMG) protein with a predicted role in sequence-specific DNA binding, RNA polymerase III transcriptional preinitiation complex assembly and chromatin remodeling	1.91808	10.1	1	2	2	2	297	33.0196	5.74463
AN0092	AN0092 AspGDID:ASPL0000053007 COORDS:ChrVIII_A_nidulans_FGSC_A4:4643455-4645730W, translated using codon table 1 (741 amino acids) Uncharacterized ORF; Putative methyltransferase with a predicted role in histidine metabolism	1.82735	3.64	1	2	2	2	741	83.9207	5.60498
AN0410	bimG AspGDID:ASPL0000057340 COORDS:ChrVIII_A_nidulans_FGSC_A4:3643225-3641938C, translated using codon table 1 (323 amino acids) Verified ORF; Essential protein phosphatase required for the completion of anaphase; uORF encoded in the upstream leader sequence	0	9.29	1	2	2	2	323	37.1516	5.78271
AN0734	H4.1 AspGDID:ASPL0000056547 COORDS:ChrVIII_A_nidulans_FGSC_A4:2629659-2629235C, translated using codon table 1 (103 amino acids) Uncharacterized ORF; Histone H4.1, core histone protein; nearly identical to histone H4.2	10.0553	31.07	1	1	3	4	103	11.3494	11.356
